# Supplementary material for: 3D flower-like architectures assembled by ZnO porous nanosheets with higher surface area for enhanced lower temperature NO 2 gas sensors
Source: Royal Society of Chemistry journal article supplement (doi:10.1039/d5tc00223k), 2025-01-01
Supplement: d5tc00223k1.pdf [file d5tc00223k1.pdf]

## The Supporting Figures

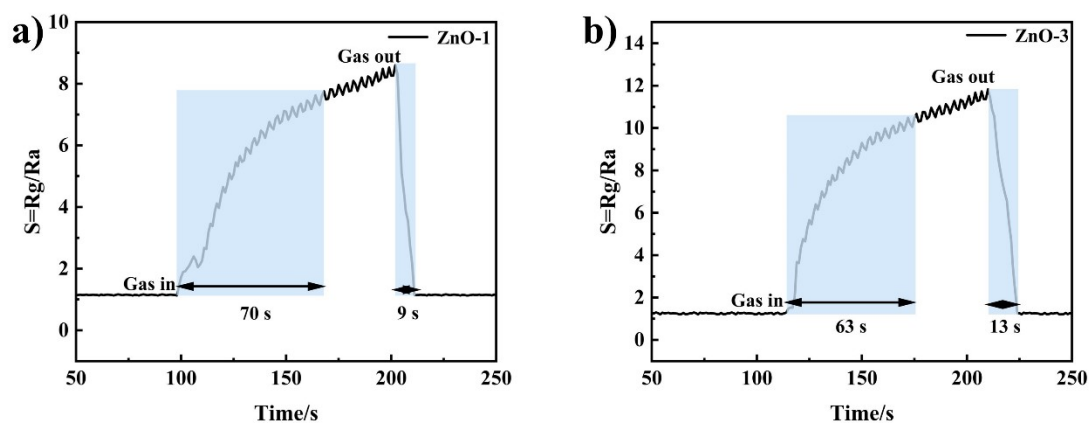

**Fig. S1** (a) Instantaneous response-recovery curve of ZnO-1;(b) Instantaneous response-recovery curve of ZnO-3.
